# Supplementary material for: Aggressive B-cell lymphoma cases with 11q aberration patterns indicate a spectrum beyond Burkitt-like lymphoma
Source: PubMed Central journal article supplement — Blood Adv. 2021 Dec 7;5(23):5220–5. doi: 10.1182/bloodadvances.2021004635 (PMC9153036; doi:10.1182/bloodadvances.2021004635), 2021-12-07
Supplement: advancesADV2021004635-suppl1.pdf [file advancesADV2021004635-suppl1.pdf]

## **Supplementary Methods & Results**

### **Clinicopathological work-up**

Diagnosis was confirmed by two experienced hematopathologists (AF & HM) in accordance with the latest edition of the WHO classification of tumors of the hematopoietic and lymphoid tissues<sup>1</sup>. Clinical information was collected from the original files, and data concerning performance status (Eastern Cooperative Oncology Group [ECOG]), disease extent, treatment modalities, response rate, relapse pattern, cause of death and survival were recorded, as were initial serum levels of lactate dehydrogenase (LDH). Extent of disease was routinely evaluated according to the Cotswold modifications of the Ann Arbor classification<sup>2</sup>. All samples were collected as part of standard clinical care, and all studies were approved by the Ethics Commission at the University of Lübeck and are in accordance with the Declaration of Helsinki (18-356). Patients gave written informed consent regarding routine diagnostic and academic assessment of their biopsy specimen as well as transfer of their clinical data.

### **Review of Mitelman Database**

The Mitelman Database has been reviewed in order to identify cases of aggressive B-cell lymphomas harboring cytogenetic aberrations on chromosome 11. Reviewing process included all numerical aberrations of 11q-gains or losses (trisomy or monosomy) from all topographies using the search terms ‘B-cell lymphoma associated with hemophagocytic syndrome’, ‘Burkitt-lymphoma/leukemia’, ‘diffuse large B-cell lymphoma’, ‘mediastinal large B-cell lymphoma’, ‘post-transplant lymphoproliferative disorder’, ‘primary effusion lymphoma’ and ‘plasma cell neoplasm’. There was no explicit search term for ‘high grade B-cell lymphoma’ available. High-grade B-cell lymphomas have been detected by the identification of 8q24 (*MYC*), 18q21 (*BCL2*) and/or 3q27 (*BCL6*) rearrangements deposited among the abovementioned search terms. The composition of relevant cases is depicted in **Supplementary Table 1**. To the best of our knowledge, we reviewed published datasets for different entities of aggressive B-cell

lymphomas exhibiting numerical aberrations on chromosome 11. At this point it cannot be ruled out that there exist additional published cases of aggressive B-cell lymphoma others than BLL which can be associated with 11q aberrations not included in the Mitelman catalogue.

### **Cytogenetic assessment**

In total, 55 cases have been reviewed for cytogenetic analysis. There were eight dropouts due to insufficient sample quality or quantity. Cases in which sufficient biopsy-material was available and those excluded from further analysis were comparable regarding clinical features and characteristics. Consecutively, samples of 47 DLBCL/HGBL cases proceeded to further cytogenetic assessment (**Supplementary Tables 3.1 & 3.2**).

Wherever fresh biopsy material was available, cytogenetic analyses on R-banded metaphases and FISH with break-apart probes for *MYC*-, *IGH*-, *BCL2*-, and *BCL6*-genes as well as *IGH-MYC* fusion were performed (all Abbott-Vysis, Park, IL). Additionally, a custom FISH-assay for detection of BBL-11q-gains/losses in combination with a centromere 11 probe was used<sup>3</sup>. There were no cytogenetic alterations on chromosome 11 in 35 of 47 cases (74.5%). Trisomy or tetrasomy of chromosome 11 were found in six cases (12.7%; trisomy n=5 and tetrasomy n=1). In one case an 11q-gain pattern could be detected (2.1%) as well as a monosomy 11 in another case (2.1%). Decisively, a BLL-11q pattern could be found in four cases (8.5%) (**Supplementary Table 2**).

## Supplementary Table 1

**Supplementary Table 1.** Review of Mitelman Database in order to identify cases of aggressive B-cell lymphomas harboring numeric aberrations on chromosome 11.

| High-Grade B-cell Lymphoma |     |                                                                                                                                                                                                                                                                                                                                                                                                                             |      |          |                                             |                  |
|----------------------------|-----|-----------------------------------------------------------------------------------------------------------------------------------------------------------------------------------------------------------------------------------------------------------------------------------------------------------------------------------------------------------------------------------------------------------------------------|------|----------|---------------------------------------------|------------------|
| Sex                        | Age | Additional cytogenetic aberrations                                                                                                                                                                                                                                                                                                                                                                                          | Year | Case No. | Author                                      | Journal          |
| M                          | 45  | 3q27 ( <i>BCL6</i> ), 8q24 ( <i>MYC</i> ) and 18q21 ( <i>BCL2</i> ) rearrangement                                                                                                                                                                                                                                                                                                                                           | 2007 | 1        | Bertrand <i>et al.</i> <sup>4</sup>         | Leukemia         |
| Karyotype                  |     | 55,XY,+X,t(3;14;18)(q27;q32;q21),del(3)(q26q27),+der(3)t(1;3)(q21;q27),+5,+6,t(8;9)(q24;p13),+11,+12,+13,+16,der(17)t(1;17)(q21;p13),+20                                                                                                                                                                                                                                                                                    |      |          |                                             |                  |
| F                          | 66  | 8q24 ( <i>MYC</i> ) and 18q21 ( <i>BCL2</i> ) rearrangement                                                                                                                                                                                                                                                                                                                                                                 | 2007 | 12       | Bertrand <i>et al.</i> <sup>4</sup>         | Leukemia         |
| Karyotype                  |     | 82,XX,-X,add(X)(p22),-1,add(1)(p21),add(1)(p31),add(1)(p32),-2,-2,add(3)(p21),add(4)(p13),del(4)(q28),-5,-6,-6,add(6)(p12)x2,add(8)(q24),add(9)(p21)x2,add(10)(p12),-11,-13,add(14)(q32)x2,-15,-15,-17,del(17)(p11),-18,add(18)(q21),-19,-20,-21,-22,+7mar                                                                                                                                                                  |      |          |                                             |                  |
| M                          | 49  | 3q27 ( <i>BCL6</i> ) and 8q24 ( <i>MYC</i> ) rearrangement                                                                                                                                                                                                                                                                                                                                                                  | 2011 | 1        | Shi <i>et al.</i> <sup>5</sup>              | Hum Pathol       |
| Karyotype                  |     | 76~79,der(X)t(X;2)(q21;p23)x2,-Y,-Y,-1,dic(1;14)(p36;p11),del(2)(p23)x2,del(3)(q27)x2,add(4)(q21),-5,add(5)(p13),add(6)(q21),del(6)(q21),add(7)(q11)x2,-8,add(8)(q24)x2,der(8;13)(q10;q10),-9,-10,-11,add(12)(q13),del(12)(p11),der(12)t(2;12)(p23;q24),+13,-14,-14,-15,add(15)(p11),-17,-17,+19,add(19)(p13)x2,-22,-22,-22,+1~2mar                                                                                         |      |          |                                             |                  |
| F                          | -   | 8q24 ( <i>MYC</i> ) and 18q21 ( <i>BCL2</i> ) rearrangement                                                                                                                                                                                                                                                                                                                                                                 | 2004 | 8328     | Cook <i>et al.</i> <sup>6</sup>             | Am J Clin Pathol |
| Karyotype                  |     | 74~80,XX,add(6)(q27)x2,+add(7)(q36),+8,t(8;22)(q24;q11),del(9)(p22),+11,-14,t(14;18)(q32;q21),-15,+21,+add(21)(q22),add(22)(q13),+2~6mar                                                                                                                                                                                                                                                                                    |      |          |                                             |                  |
| M                          | -   | 3q27 ( <i>BCL6</i> ) and 8q24 ( <i>MYC</i> ) rearrangement                                                                                                                                                                                                                                                                                                                                                                  | 2002 | 11       | Itoyama <i>et al.</i> <sup>7</sup>          | GCC              |
| Karyotype                  |     | 47,XY,del(2)(q21q31),t(3;22)(q27;q11),del(6)(q13q15),der(8)t(2;8)(q21;q24),+11,der(20)t(1;20)(q21;q13)                                                                                                                                                                                                                                                                                                                      |      |          |                                             |                  |
| F                          | 42  | 8q24 ( <i>MYC</i> ) and 18q21 ( <i>BCL2</i> ) rearrangement                                                                                                                                                                                                                                                                                                                                                                 | 2007 | 9        | Johnson <i>et al.</i> <sup>8</sup>          | Blood            |
| Karyotype                  |     | 76~80,XX,r(X)(p?q?), 1?,del(2)(p?1q?1),del(3)(p21),del(6)(q12),+7,+der(7)t(1;7)(?p13;?p22)t(7;16)(q?;?q11),+r(7)(p?q?),t(8;9)(q24;p13)x3,+10,+11,+der(12)t(2;12)(?;q24),t(14;18)(q32;q21)x2,-15,-16,-16,+der(18)t(14;18),+20,+20,+21                                                                                                                                                                                        |      |          |                                             |                  |
| F                          | 65  | 8q24 ( <i>MYC</i> ) and 18q21 ( <i>BCL2</i> ) rearrangement                                                                                                                                                                                                                                                                                                                                                                 | 2009 | 12       | Johnson <i>et al.</i> <sup>9</sup>          | Blood            |
| Karyotype                  |     | 65~71,XX,-X,der(1)t(1;3)(p36;q27)x2,der(1)t(1;8)(q41;q22),-2,der(3)t(3;8)(?p25;q24)x2,+7,der(8)del(8)(p21)del(8)(q23)x2,ider(8)(q10)t(3;8)(p21;q23),-9,+11,+12,+13,t(14;18)(q32;q21),del(17)(p11),der(22)t(2;22)(?;q13)x2                                                                                                                                                                                                   |      |          |                                             |                  |
| F                          | -   | 8q24 ( <i>MYC</i> ) and 18q21 ( <i>BCL2</i> ) rearrangement                                                                                                                                                                                                                                                                                                                                                                 | 2008 | 14TR     | Johnson <i>et al.</i> <sup>10</sup>         | GCC              |
| Karyotype                  |     | 65~71,XX,-X,der(1)t(1;8)(p36;q24)x2,der(1)t(1;8)(q41;q22),?2,der(3)t(3;8)(p24;q23)x2,+7,der(8)del(8)(p21)del(8)(q23)x2,+ider(8)(q10)t(3;8)(p26;q23),-9,+11,+12,+13,t(14;18)(q32;q21),del(17)(p11),der(22)t(2;22)(?;q13)x2                                                                                                                                                                                                   |      |          |                                             |                  |
| F                          | 50  | 8q24 ( <i>MYC</i> ) and 18q21 ( <i>BCL2</i> ) rearrangement                                                                                                                                                                                                                                                                                                                                                                 | 2007 | 4        | Le Gouill <i>et al.</i> <sup>11</sup>       | Haematologica    |
| Karyotype                  |     | 46,X,-X,add(3)(p21),del(6)(q21q27),+7,t(8;9)(q24;p13),+11,t(14;18)(q32;q21),-15,add(17)(p11),+der(?)t(?)2)(?;q12)/47,idem,+mar                                                                                                                                                                                                                                                                                              |      |          |                                             |                  |
| M                          | 54  | 8q24 ( <i>MYC</i> ) and 18q21 ( <i>BCL2</i> ) rearrangement                                                                                                                                                                                                                                                                                                                                                                 | 2006 | 2        | Kanungo <i>et al.</i> <sup>12</sup>         | Mod Pathol       |
| Karyotype                  |     | 50,XY,t(2;8)(p11;q24),t(3;5)(p12;q12),+7,+8,inv(9)(p11q12),+11,t(14;18)(q32;q21),add(17)(p11),+19                                                                                                                                                                                                                                                                                                                           |      |          |                                             |                  |
| M                          | 64  | 8q24 ( <i>MYC</i> ) and 18q21 ( <i>BCL2</i> ) rearrangement                                                                                                                                                                                                                                                                                                                                                                 | 2006 | 3        | Kanungo <i>et al.</i> <sup>12</sup>         | Mod Pathol       |
| Karyotype                  |     | 51~53,XY,+X,del(2)(q32),add(4)(p16),+5,t(8;22)(q24;q11),+11,+12,t(14;18)(q32;q21),-15,+22,+2~3mar                                                                                                                                                                                                                                                                                                                           |      |          |                                             |                  |
| M                          | 33  | 8q24 ( <i>MYC</i> ) and 18q21 ( <i>BCL2</i> ) rearrangement                                                                                                                                                                                                                                                                                                                                                                 | 2013 | 3        | Havelange <i>et al.</i> <sup>13</sup>       | GCC              |
| Karyotype                  |     | 53,XY,+X,add(5)(q3?3),der(6)t(4;6)(?;q25~27),+7,t(8;14)(q24;q32),+11,+12,+12,der(13)del(13)(q31)i(13)(q10),der(15)t(1;15)(?q12;q2?5)t(1;4),+20/53,idem,der(18)t(2;18)(?;q21)                                                                                                                                                                                                                                                |      |          |                                             |                  |
| M                          | -   | 3q27 ( <i>BCL6</i> ), 8q24 ( <i>MYC</i> ) and 18q21 ( <i>BCL2</i> ) rearrangement                                                                                                                                                                                                                                                                                                                                           | 2018 | 3        | Huang <i>et al.</i> <sup>14</sup>           | Mod Pathol       |
| Karyotype                  |     | 73~82,XXY,+X,+3,t(3;4)(q27;q22)x2,+4,+5,-6,-9,del(9)(p13),del(10)(q24q26)x2,+11,+12,add(12)(p13)x2,-13,der(13)ins(13;8)(q32;q24q24)add(8)(q24),-14,t(14;18)(q32;q21),del(16)(p11)x2,+17,add(17)(p12)x2,-18,-19,add(20)(q13),+21,+22,+7~10mar                                                                                                                                                                                |      |          |                                             |                  |
| M                          | -   | 8q24 ( <i>MYC</i> ) and 18q21 ( <i>BCL2</i> ) rearrangement                                                                                                                                                                                                                                                                                                                                                                 | 1999 | 13       | Macpherson <i>et al.</i> <sup>15</sup>      | JCO              |
| Karyotype                  |     | 49~50,XY,+add(7)(q22),-8,der(8)t(8;22)(q24;q11),del(9)(p22),+11,-13,+14,t(14;18)(q32;q21),-15,-20,+21,+22,+2~3mar                                                                                                                                                                                                                                                                                                           |      |          |                                             |                  |
| F                          | 71  | 8q24 ( <i>MYC</i> ) and 18q21 ( <i>BCL2</i> ) rearrangement                                                                                                                                                                                                                                                                                                                                                                 | 2018 | 77       | Mizuno <i>et al.</i> <sup>16</sup>          | Cancer Med       |
| Karyotype                  |     | 48,XX,-4,+7,t(8;22)(q24;q11),inv(9)(p12q13)c,+11,t(14;18)(q32;q21),add(17)(p11),add(21)(p11),+mar/48,idem,-add(17),+mar                                                                                                                                                                                                                                                                                                     |      |          |                                             |                  |
| M                          | -   | 3q27 ( <i>BCL6</i> ) and 18q21 ( <i>BCL2</i> ) rearrangement                                                                                                                                                                                                                                                                                                                                                                | 2000 | 11       | Roumier <i>et al.</i> <sup>17</sup>         | Hematol J        |
| Karyotype                  |     | 55,XY,del(3)(q26q27),+der(3)t(1;3)(q21;q27),t(3;14;18)(q27;q32;q21),+5,+6,t(8;9)(q24;p12),+11,+12,+13,+16,der(17)t(1;17)(q21;p13),+20                                                                                                                                                                                                                                                                                       |      |          |                                             |                  |
| M                          | 66  | 8q24 ( <i>MYC</i> ) and 18q21 ( <i>BCL2</i> ) rearrangement                                                                                                                                                                                                                                                                                                                                                                 | 2010 | 33       | Seemiller <i>et al.</i> <sup>18</sup>       | Mod Pathol       |
| Karyotype                  |     | 51,XY,+X,der(1)add(1)(p36)del(1)(q42q44),der(1)del(1)(p36p32)ins(1;?)q21;?,add(2)(p11),der(2)t(2;7)(p21;q11),del(3)(p13p25),add(5)(q31),+der(5)t(5;14)(p14;q24)t(14;18)(q32;q21),+der(6)t(6;18)(q27;q21)t(14;18)(q32;q21),+7,add(8)(q24),ins(8;?)q22;?,+add(10)(q22),+11,-13,der(13)t(13;14)(q32;q32),-14,der(14)t(8;14)(q24;q32),der(16)t(7;16)(q11;p13),del(17)(p11p13),der(18)t(7;18)(q11;p11),+der(?)t(?)14(?;q32),+mar |      |          |                                             |                  |
| F                          | 65  | 8q24 ( <i>MYC</i> ) and 18q21 ( <i>BCL2</i> ) rearrangement                                                                                                                                                                                                                                                                                                                                                                 | 1983 | 73       | Bloomfield <i>et al.</i> <sup>19</sup>      | Cancer Res       |
| Karyotype                  |     | 82,XXX,-X,del(1)(p22),?del(2)(q32),t(2;4)(q32;q35),-3,t(3;6)(p25;q21),-4,-5,t(5;6)(q15;q27),del(6)(q21),-8,t(8;15)(q24;q24),-9,-10,-11,-12,del(12)(p11),-14,+t(14;18)(q32;q21),-16,-17,-18,-19,-22,+3mar                                                                                                                                                                                                                    |      |          |                                             |                  |
| M                          | -   | 8q24 ( <i>MYC</i> ) and 18q21 ( <i>BCL2</i> ) rearrangement                                                                                                                                                                                                                                                                                                                                                                 | 1988 | 26       | Chenevix-Trench <i>et al.</i> <sup>20</sup> | MOTP             |
| Karyotype                  |     | 60,XY,-X,+Y,-1,-2,-4,-8,add(8)(q24),-9,del(9)(p13),-10,-11,-12,-12,+t(12;17)(q?;q?)x2,-13,t(14;18)(q32;q21),-15,-16,-17,add(17)(q25),-22,+mar                                                                                                                                                                                                                                                                               |      |          |                                             |                  |
| M                          | -   | 3q27 ( <i>BCL6</i> ), 8q24 ( <i>MYC</i> ) and 18q21 ( <i>BCL2</i> ) rearrangement                                                                                                                                                                                                                                                                                                                                           | 2018 | 6        | Huang <i>et al.</i> <sup>14</sup>           | Mod Pathol       |
| Karyotype                  |     | 84~87,XXYY,+X,add(1)(q21),-2,+3,+3,+3,der(3)t(3;8)(q27;q24),del(3)(q11)x2,del(3)(q21)x2,4,6,add(7)(q36)x2,-8,ider(8)(q10)t(3;8),-10,-10,-11,t(14;18)(q32;q21)x2,-15,-17,-17,+18,+18,-19,-19,-19,-22,-22,+2~4mar                                                                                                                                                                                                             |      |          |                                             |                  |
| M                          | 68  | 3q27 ( <i>BCL6</i> ), 8q24 ( <i>MYC</i> ), 11q13 ( <i>CCND1</i> ) and 18q21 ( <i>BCL2</i> ) rearrangement                                                                                                                                                                                                                                                                                                                   | 2011 | 10       | Bacher <i>et al.</i> <sup>21</sup>          | GCC              |
| Karyotype                  |     | 51,XX,+i(1)(q10),t(2;3)(p12;q27),+5,t(8;14)(q24;q32),del(9)(p21p22),+11,der(11)t(11;14)(q13;q32)t(14;18)(q32;q21),+12,der(14)t(11;14)(q13;q32),der(18)t(14;18)(q32;q21),+20                                                                                                                                                                                                                                                 |      |          |                                             |                  |
| F                          | 57  | <i>BCL6</i> - and <i>MYC</i> -Break                                                                                                                                                                                                                                                                                                                                                                                         | 1999 | 2        | Lin <i>et al.</i> <sup>22</sup>             | Am J Clin Pathol |

|                                                                                                              |                                                                                                                                        |                                           |      |   |                                    |                    |
|--------------------------------------------------------------------------------------------------------------|----------------------------------------------------------------------------------------------------------------------------------------|-------------------------------------------|------|---|------------------------------------|--------------------|
| Karyotype                                                                                                    | 51,XX,+X,add(3)(q27),t(6;14)(p21;q32),t(8;14)(q24;q32),+11,+12,+13,-19,+22,+22,+4mar/50,idem,-9                                        |                                           |      |   |                                    |                    |
| M                                                                                                            | 67                                                                                                                                     | 8q24 (MYC) and 18q21 (BCL2) rearrangement | 2011 | 1 | Tanaka <i>et al.</i> <sup>23</sup> | J Clin Exp Hematop |
| Karyotype                                                                                                    | 54,XY,+X,+1,+7,+7,+8,t(8;22)(q24;q11)x2,+11,+13,del(13)(q?)x2,add(14)(q22),der(14)add(14)(p11)t(14;18)(q32;q21),der(18)t(14;18)x2?,+20 |                                           |      |   |                                    |                    |
| F, female; M, male; No., number. GCC, Genes Chromosomes Cancer; MOTP, Medical Oncology Tumor Pharmacotherapy |                                                                                                                                        |                                           |      |   |                                    |                    |

| Diffuse large B-cell lymphoma                                                                                                                              |                                                                                                                                                                                                                                                                                                                                                                                      |                                    |      |          |                                          |                  |
|------------------------------------------------------------------------------------------------------------------------------------------------------------|--------------------------------------------------------------------------------------------------------------------------------------------------------------------------------------------------------------------------------------------------------------------------------------------------------------------------------------------------------------------------------------|------------------------------------|------|----------|------------------------------------------|------------------|
| Sex                                                                                                                                                        | Age                                                                                                                                                                                                                                                                                                                                                                                  | Additional cytogenetic aberrations | Year | Case No. | Author                                   | Journal          |
| F                                                                                                                                                          | 67                                                                                                                                                                                                                                                                                                                                                                                   | 8q24 (MYC) rearrangement           | 1994 | 1        | Gladstone <i>et al.</i> <sup>24</sup>    | CGC              |
| Karyotype                                                                                                                                                  | 51~56,XX,+X,+del(1)(q21),+2,+5,+6,+7,+del(8)(q24),+9,+10,+11,+13,+14,+17,+20,-21,der(21)t(1;21)(q1;p11),-22,-22,+2mar                                                                                                                                                                                                                                                                |                                    |      |          |                                          |                  |
| F                                                                                                                                                          | 47                                                                                                                                                                                                                                                                                                                                                                                   | 8q24 (MYC) rearrangement           | 1989 | 1        | Park <i>et al.</i>                       | GCC              |
| Karyotype                                                                                                                                                  | 77,XXX,+X,+1,+1,add(1)(p13)x3,add(3)(p12),+add(3)(p21),-4,-6,t(6;7)(p21;q36),+der(7),t(8;14)(q24;q11)x2,-9,+11,+12,+13,der(13)t(1;13)(p13;q32)x2,+14,-15,+der(16)t(16;17)(p11;q11),-17,+18,+20,+21,-22                                                                                                                                                                               |                                    |      |          |                                          |                  |
| M                                                                                                                                                          | 53                                                                                                                                                                                                                                                                                                                                                                                   | 8q24 (MYC) rearrangement           | 1980 | 10       | Reeves <i>et al.</i> <sup>25</sup>       | Hum Genet        |
| Karyotype                                                                                                                                                  | 51,XY,der(6)t(1;6)(p22;q13~15),der(8)t(8;16)(q24;p11),+11,+12,der(13)t(2;13)(q21;q14),del(15)(q22),+16,+20,+mar                                                                                                                                                                                                                                                                      |                                    |      |          |                                          |                  |
| M                                                                                                                                                          | 83                                                                                                                                                                                                                                                                                                                                                                                   | 8q24 (MYC) rearrangement           | 2006 | 3        | Bosga-Bouwer <i>et al.</i> <sup>26</sup> | GCC              |
| Karyotype                                                                                                                                                  | 75~99,XXYY,+Y,der(1)t(1;11)(q32;q13)x2,-2,-2,-5,-5,add(6)(q?15),add(6)(q?21),add(7)(q22)x2,i(7)(q10),-8,add(8)(q24)x2,-9,-9,-9,-9,-10,-11,-11,del(11)(q13q21),-12,-13,-14,-15,-16,-16,-17,-17,-17,-17,dup(18)(q12q23)x2,-19,-19,-20,-22,+der(?)t(?)5)(?;q13)x2,+der(?)t(?)17)(?;q21)x2,+13mar                                                                                        |                                    |      |          |                                          |                  |
| M                                                                                                                                                          | -                                                                                                                                                                                                                                                                                                                                                                                    | 8q24 (MYC) rearrangement           | 2007 | 125      | Aamot <i>et al.</i> <sup>27</sup>        | JCRCO            |
| Karyotype                                                                                                                                                  | 79~81,XXXY,add(1),-2,del(2)(p13),-3,-3,-4,-8,-8,der(8)t(8;11)(q24;q13),add(9)(p24),-10,-10,-11,-14,t(14;18),-15,-16,add(19)(q13),-22,+4-10mar                                                                                                                                                                                                                                        |                                    |      |          |                                          |                  |
| M                                                                                                                                                          | -                                                                                                                                                                                                                                                                                                                                                                                    | 8q24 (MYC) rearrangement           | 2004 | 3987     | Cook <i>et al.</i> <sup>6</sup>          | Am J Clin Pathol |
| Karyotype                                                                                                                                                  | 84~87,XXYY,i(1)(q10),-2,del(3)(p11p21),-4,inv(4)(p12q21),add(6)(q23)x2,add(8)(q24),add(9)(p22)x2,-11,-11,-13,t(13;14)(p10;q10),-15,-16,add(16)(p12),add(17)(q23)x1~2,i(17)(q10),der(19)t(11;19)(q13;q13),add(20)(p13),-21,-22,-22,add(22)(p13),+mar                                                                                                                                  |                                    |      |          |                                          |                  |
| M                                                                                                                                                          | 64                                                                                                                                                                                                                                                                                                                                                                                   | 8q24 (MYC) rearrangement           | 2013 | 76       | Havelange <i>et al.</i> <sup>13</sup>    | GCC              |
| Karyotype                                                                                                                                                  | 45,XY,der(5)t(5;15)(q11;?),del(13)(q31q33),der(13;20)(q10;q10),del(17)(p11p12),der(20;22)(p10;q10)/82,XXY,-X,der(X)t(X;2;3)(?q21;?p12),der(X)t(X;3)(p11-21;?),der(1)hsr(1)t(1;1)(p?22;q?21),der(2)t(2;5)(?;q11),-3,der(3)t(3;4),-4,der(4)t(2;4;5),?del(5)(q31q33),t(8;22)(q24;q11),der(8)t(8;22)(q24;q11),der(9)t(X;9;9;2)(?q13;?p13;?q22;?),-11,-12,-13,-14,-15,-16,-18,-19,+21,-22 |                                    |      |          |                                          |                  |
| M                                                                                                                                                          | 57                                                                                                                                                                                                                                                                                                                                                                                   | 8q24 (MYC) rearrangement           | 2010 | 34       | Seegmiller <i>et al.</i> <sup>18</sup>   | Mod Pathol       |
| Karyotype                                                                                                                                                  | 80~85,XY,-X,-Y,del(1)(p32p36),-2,ins(2;?)(q31;?)x2,-4,-4,-5,add(5)(p15),add(6)(q13),add(6)(q23),ins(6;?)(q23;?),add(7)(q11),t(8;14)(q24;q32)x2,add(9)(q22)x2,-10,-10,-11,-12,-13,-15,+16,add(16)(p11),add(16)(p13),-18,-18,-20,-21,-22,-22,+7~13mar/75~87,idem,add(19)(p13)                                                                                                          |                                    |      |          |                                          |                  |
| F, female; M, male; No., number. CGC, Cancer Genetics Cytogenetics; GCC, Genes Chromosomes Cancer; JCRCO, Journal of Cancer Research and Clinical Oncology |                                                                                                                                                                                                                                                                                                                                                                                      |                                    |      |          |                                          |                  |

| Mediastinal B-cell lymphoma                                    |                                                                                                                                                 |                                    |      |          |                                        |         |
|----------------------------------------------------------------|-------------------------------------------------------------------------------------------------------------------------------------------------|------------------------------------|------|----------|----------------------------------------|---------|
| Sex                                                            | Age                                                                                                                                             | Additional cytogenetic aberrations | Year | Case No. | Author                                 | Journal |
| M                                                              | -                                                                                                                                               | 8q24 (MYC) rearrangement           | 2002 | 3        | Palanisamy <i>et al.</i> <sup>28</sup> | GCC     |
| Karyotype                                                      | 91,XX,-Y,-Y,-1,t(3;14)(p14;q32),+6,i(6)(p10)x2,del(7)(q22),add(8)(q24),-11,+add(12)(p11),-13,-14,-15,add(15)(p11),add(15)(q26),+17,+18,+20,+mar |                                    |      |          |                                        |         |
| F, female; M, male; No., number. GCC, Genes Chromosomes Cancer |                                                                                                                                                 |                                    |      |          |                                        |         |

| Burkitt Lymphoma / Leukemia                                                                       |                                                                                                                                                |                                           |      |          |                                       |                  |
|---------------------------------------------------------------------------------------------------|------------------------------------------------------------------------------------------------------------------------------------------------|-------------------------------------------|------|----------|---------------------------------------|------------------|
| Sex                                                                                               | Age                                                                                                                                            | Additional cytogenetic aberrations        | Year | Case No. | Author                                | Journal          |
| M                                                                                                 | 18                                                                                                                                             | 8q24 (MYC) rearrangement                  | 2003 | 56       | Kumari <i>et al.</i> <sup>29</sup>    | CGC              |
| Karyotype                                                                                         | 46,XY,+7,t(8;14)(q24;q32),-9,t(9;13)(p12;q12),-11,-13,+2mar                                                                                    |                                           |      |          |                                       |                  |
| M                                                                                                 | 11                                                                                                                                             | 8q24 (MYC) rearrangement                  | 2003 | 61       | Kumari <i>et al.</i> <sup>29</sup>    | CGC              |
| Karyotype                                                                                         | 45,X,-Y,t(8;14)(q24;q32),-11,+22                                                                                                               |                                           |      |          |                                       |                  |
| M                                                                                                 | 5                                                                                                                                              | 8q24 (MYC) rearrangement                  | 1988 | 3        | Cervantes <i>et al.</i> <sup>30</sup> | CGC              |
| Karyotype                                                                                         | 81,XX,der(Y)t(Y;1)(q12;q25)x2,+Y,-1,+2,-3,-5,-8,-8,t(8;14)(q24;q32),-9,-9,-10,-10,+11,-12,-14,-14,add(14)(q?),+?i(17)(q10),-18,-18,-20,-21,-21 |                                           |      |          |                                       |                  |
| F                                                                                                 | 75                                                                                                                                             | 8q24 (MYC) rearrangement                  | 2011 | 5        | Choi <i>et al.</i> <sup>31</sup>      | J Korean Med Sci |
| Karyotype                                                                                         | 50~51,XX,add(6)(q27),+7,+8,t(8;14)(q24;q32),+11,+12,+20,+mar                                                                                   |                                           |      |          |                                       |                  |
| F                                                                                                 | 76                                                                                                                                             | 8q24 (MYC) and 18q21 (BCL2) rearrangement | 2006 | 9        | D'Achille <i>et al.</i> <sup>32</sup> | CGC              |
| Karyotype                                                                                         | 49,XX,+X,+i(1)(q10),+2,t(8;22)(q24;q11),t(14;18)(q32;q21)/53~57,idem,+X,+5,+7,+der(8)t(8;22),+11,+der(14)t(14;18),+20,+22                      |                                           |      |          |                                       |                  |
| F                                                                                                 | 73                                                                                                                                             | 8q24 (MYC) rearrangement                  | 2013 | 41       | Havelange <i>et al.</i> <sup>13</sup> | GCC              |
| Karyotype                                                                                         | 46,X,der(X)del(X)(p?)del(X)(q?),der(1)t(X;1)(?;p?13),der(6)t(6;9)(q12;?),t(8;14)(q24;q32),+11,-15                                              |                                           |      |          |                                       |                  |
| M                                                                                                 | 64                                                                                                                                             | 8q24 (MYC) rearrangement                  | 2013 | 19       | Lundin <i>et al.</i> <sup>33</sup>    | GCC              |
| Karyotype                                                                                         | 47,XY,+X,t(8;14)(q24;q32)/48,idem,+7/48,idem,+1,der(1;2)(q10;q10)/52,idem,+i(1)(q10),+4,+6,+11/48,idem,+der(1;7)(q10;p10)                      |                                           |      |          |                                       |                  |
| F                                                                                                 | 83                                                                                                                                             | MYC-Break                                 | 2002 | 9        | Velangi <i>et al.</i> <sup>33</sup>   | J Clin Pathol    |
| Karyotype                                                                                         | 55~56,XX,+X,+X,+add(1)(p10),del(1)(q10),+7,t(8;14)(q24;q32),+11,del(16)(q?),+21,+21                                                            |                                           |      |          |                                       |                  |
| -                                                                                                 | -                                                                                                                                              | 8q24 (MYC) rearrangement                  | 1976 | 8        | Zech <i>et al.</i> <sup>34</sup>      | Int J Cancer     |
| Karyotype                                                                                         | 48~53,X?,+X,+2,+3,t(8;14)(q24;q32),+9,+10,+11,+12,+20                                                                                          |                                           |      |          |                                       |                  |
| F, female; M, male; No., number. CGC, Cancer Genetics Cytogenetics; GCC, Genes Chromosomes Cancer |                                                                                                                                                |                                           |      |          |                                       |                  |

## Supplementary Table 2

**Supplementary Table 1.** Clinical courses of aggressive B-cell lymphoma cases with 11q-deletion identified by FISH.

| Characteristics                                                                                                                                                                                                                                                                                               | Case #1                                         | Case #2                                                                  | Case #3                                    | Case #4                                    |
|---------------------------------------------------------------------------------------------------------------------------------------------------------------------------------------------------------------------------------------------------------------------------------------------------------------|-------------------------------------------------|--------------------------------------------------------------------------|--------------------------------------------|--------------------------------------------|
| <b>Diagnosis</b>                                                                                                                                                                                                                                                                                              | B-cell lymphoma with Burkitt-like features      | High-grade B-cell lymphoma with <i>MYC</i> and <i>BCL2</i> rearrangement | B-cell lymphoma with Burkitt-like features | B-cell lymphoma with Burkitt-like features |
| <b>Age</b>                                                                                                                                                                                                                                                                                                    | 34                                              | 73                                                                       | 34                                         | 71                                         |
| <b>Sex</b>                                                                                                                                                                                                                                                                                                    | male                                            | male                                                                     | male                                       | male                                       |
| <b>Risk stratification</b>                                                                                                                                                                                                                                                                                    |                                                 |                                                                          |                                            |                                            |
| <b>Ann-Arbor-stage</b>                                                                                                                                                                                                                                                                                        | IVB                                             | IIA                                                                      | IA                                         | IIIB                                       |
| <b>R-IP1</b>                                                                                                                                                                                                                                                                                                  | 4                                               | 3                                                                        | 1                                          | 3                                          |
| <b>Extranodal sites</b>                                                                                                                                                                                                                                                                                       | 2                                               | 1                                                                        | 0                                          | 2                                          |
| <b>ECOG-PS</b>                                                                                                                                                                                                                                                                                                | 2                                               | 2                                                                        | 1                                          | 2                                          |
| <b>LDH (U/l)</b>                                                                                                                                                                                                                                                                                              | 1200                                            | 327                                                                      | 124                                        | 206                                        |
| <b>Hans-Classifier</b>                                                                                                                                                                                                                                                                                        | GCB                                             | GCB                                                                      | Non-GCB                                    | GCB                                        |
| <b>BCL2 (IHC)</b>                                                                                                                                                                                                                                                                                             | positive                                        | positive                                                                 | negative                                   | negative                                   |
| <b>BCL6 (IHC)</b>                                                                                                                                                                                                                                                                                             | n.a.                                            | positive                                                                 | negative                                   | negative                                   |
| <b>FISH</b>                                                                                                                                                                                                                                                                                                   | 11q24.3~qter deletion without 11q-proximal gain | 11q gain/loss pattern, <i>MYC</i> and <i>BCL2</i> rearrangements         | 11q gain/loss pattern                      | 11q gain/loss pattern                      |
| <b>Particularities</b>                                                                                                                                                                                                                                                                                        | HIV-infection                                   | n.a.                                                                     | n.a.                                       | n.a.                                       |
| <b>Treatment modalities</b>                                                                                                                                                                                                                                                                                   |                                                 |                                                                          |                                            |                                            |
| <b>1st line treatment</b>                                                                                                                                                                                                                                                                                     | MATRix                                          | R-CHOP                                                                   | R-CHOP                                     | R-CHOP                                     |
| <b>Best response</b>                                                                                                                                                                                                                                                                                          | Progressive disease                             | Complete remission                                                       | Complete remission                         | Partial remission                          |
| <b>2<sup>nd</sup> line treatment</b>                                                                                                                                                                                                                                                                          | -                                               | -                                                                        | -                                          | R-bendamustine                             |
| <b>Best response</b>                                                                                                                                                                                                                                                                                          | -                                               | -                                                                        | -                                          | Progressive disease                        |
| <b>Survival</b>                                                                                                                                                                                                                                                                                               |                                                 |                                                                          |                                            |                                            |
| <b>PFS (months)</b>                                                                                                                                                                                                                                                                                           | 2                                               | 50                                                                       | 29                                         | 29                                         |
| <b>OS (months)</b>                                                                                                                                                                                                                                                                                            | 3                                               | 50                                                                       | 29                                         | 56                                         |
| <b>Death event</b>                                                                                                                                                                                                                                                                                            | yes                                             | no                                                                       | no                                         | yes                                        |
| ECOG-PS, Eastern Cooperative Oncology Group- Performance Status; FISH, fluorescence in situ hybridization; GCB, germinal center B-cell; HIV, human immunodeficiency virus; IHC, immunohistochemistry; LDH, lactate dehydrogenase; n.a., not applicable, OS, overall survival; PFS, progression free survival. |                                                 |                                                                          |                                            |                                            |

### Supplementary Table 3

**Supplementary Table 3.1.** Composition of FISH-studies on alterations on chromosome 11 in HGBL-patients.

| <b>High-grade B-cell lymphoma (DHL/THL)</b> |            |            |                |                                       |                                                  |
|---------------------------------------------|------------|------------|----------------|---------------------------------------|--------------------------------------------------|
| <b>ID</b>                                   | <b>Age</b> | <b>Sex</b> | <b>Samples</b> | <b>FISH ISCN</b>                      | <b>Finding</b>                                   |
| 1                                           | 72         | m          | 1              | nuc ish(D11Z1,RP11-414G21,ETS1)x4     | Tetrasomy 11                                     |
| 2                                           | 73         | m          | 2              | nuc ish(D11Z1x2,RP11-414G21x3,ETS1x1) | 11q gain/loss pattern *                          |
|                                             |            |            |                | nuc ish(D11Z1x2,RP11-414G21x3,ETS1x1) |                                                  |
| 3                                           | 76         | f          | 3              | nuc ish(D11Z1,RP11-414G21,ETS1)x2     | Normal                                           |
|                                             |            |            |                | nuc ish(D11Z1,RP11-414G21,ETS1)x2     |                                                  |
|                                             |            |            |                | nuc ish(D11Z1,RP11-414G21,ETS1)x2     |                                                  |
| 4                                           | 89         | f          | 1              | nuc ish(D11Z1,RP11-414G21,ETS1)x2     | Normal                                           |
| 5                                           | 80         | m          | 1              | nuc ish(D11Z1,RP11-414G21,ETS1)x1     | Monosomy 11                                      |
| 6                                           | 73         | f          | 1              | nuc ish(D11Z1,RP11-414G21,ETS1)x2     | Normal                                           |
| 7                                           | 45         | f          | 1              | nuc ish(RP11-414G21,ETS1)x2           | Normal                                           |
| 8                                           | 62         | f          | 1              | nuc ish(D11Z1,RP11-414G21,ETS1)x3     | Trisomy 11                                       |
| 9                                           | 52         | m          | 1              | nuc ish(D11Z1,RP11-414G21)x2          | Normal ( <i>ETS1</i> hybridization unsuccessful) |
| 10                                          | 60         | f          | 1              | nuc ish(D11Z1,RP11-414G21,ETS1)x2     | Normal                                           |
| 11                                          | 75         | f          | 2              | nuc ish(D11Z1,RP11-414G21,ETS1)x2     | Normal                                           |
|                                             |            |            |                | nuc ish(D11Z1,RP11-414G21,ETS1)x2     |                                                  |
| 12                                          | 67         | m          | 1              | nuc ish(D11Z1,RP11-414G21,ETS1)x2     | Normal                                           |
| 13                                          | 74         | f          | 1              | nuc ish(D11Z1,RP11-414G21,ETS1)x2     | Normal                                           |
| 14                                          | 76         | m          | 1              | nuc ish(D11Z1,RP11-414G21,ETS1)x2     | Normal                                           |
| 16                                          | 66         | m          | 1              | nuc ish(D11Z1,RP11-414G21,ETS1)x2     | Normal                                           |
| 18                                          | 82         | f          | 1              | nuc ish(RP11-414G21,ETS1)x2           | Normal (D11Z1 hybridization unsuccessful)        |
| 20                                          | 54         | f          | 1              | nuc ish(D11Z1,RP11-414G21,ETS1)x2     | Normal                                           |
| 22                                          | 42         | m          | 1              | nuc ish(RP11-414G21,ETS1)x2           | Normal (D11Z1 hybridization unsuccessful)        |
| 24                                          | 35         | f          | 1              | nuc ish(D11Z1,RP11-414G21,ETS1)x2     | Normal                                           |
| 27                                          | 58         | m          | 1              | nuc ish(D11Z1,RP11-414G21,ETS1)x2     | Normal                                           |
| 28                                          | 88         | f          | 1              | nuc ish(RP11-414G21,ETS1)x2           | Normal (D11Z1 hybridization unsuccessful)        |
| 32                                          | 56         | f          | 1              | nuc ish(D11Z1,RP11-414G21,ETS1)x2     | Normal                                           |
| 39                                          | 69         | f          | 1              | nuc ish(D11Z1,RP11-414G21,ETS1)x2     | Normal                                           |
| 40                                          | 75         | f          | 1              | nuc ish(D11Z1,RP11-414G21,ETS1)x2     | Normal                                           |
| 42                                          | 52         | f          | 2              | nuc ish 11 (RP11-414G21x2)            | Normal                                           |
|                                             |            |            |                | nuc ish(D11Z1,RP11-414G21,ETS1)x2     |                                                  |
| 43                                          | 79         | m          | 1              | nuc ish(D11Z1,RP11-414G21,ETS1)x2     | Normal                                           |
| 44                                          | 67         | m          | 1              | nuc ish(D11Z1,RP11-414G21,ETS1)x2     | Normal                                           |
| 45                                          | 70         | m          | 1              | nuc ish(D11Z1,RP11-414G21,ETS1)x2     | Normal                                           |
| 46                                          | 64         | m          | 1              | nuc ish(D11Z1,RP11-414G21,ETS1)x2     | Normal                                           |

BL, Burkitt-like; DHL, double-hit lymphoma; f, female; FISH, fluorescence in-situ hybridization; m, male; THL, triple-hit lymphoma.  
\*Case #2

**Supplementary Table 3.2.** Composition of FISH-studies on alterations on chromosome 11 in patients with triple negative aggressive B-cell lymphoma.

| <b>Aggressive B-cell lymphoma (triple negative)</b> |            |            |                |                                           |                                                               |
|-----------------------------------------------------|------------|------------|----------------|-------------------------------------------|---------------------------------------------------------------|
| <b>ID</b>                                           | <b>Age</b> | <b>Sex</b> | <b>Samples</b> | <b>FISH ISCN</b>                          | <b>Finding</b>                                                |
| 15                                                  | 71         | m          | 2              | nuc ish(RP11-414G21x3,ETS1x1)             | 11q gain/loss pattern *<br>(D11Z1 hybridization unsuccessful) |
|                                                     |            |            |                | nuc ish(RP11-414G21x3,ETS1x1)             |                                                               |
| 17                                                  | 68         | f          | 1              | nuc ish(D11Z1,RP11-414G21,ETS1)x3         | Trisomy 11                                                    |
| 19                                                  | 63         | m          | 1              | nuc ish(D11Z1,RP11-414G21,ETS1)x2         | Normal                                                        |
| 21                                                  | 52         | m          | 1              | nuc ish(RP11-414G21,ETS1)x3               | Trisomy 11 (D11Z1 hybridization unsuccessful)                 |
| 23                                                  | 37         | m          | 1              | nuc ish(D11Z1,RP11-414G21,ETS1)x2         | Normal                                                        |
| 25                                                  | 27         | m          | 1              | nuc ish(D11Z1,RP11-414G21,ETS1)x2         | Normal                                                        |
| 26                                                  | 69         | f          | 1              | nuc ish(D11Z1,RP11-414G21,ETS1)x3         | Trisomy 11                                                    |
| 29                                                  | 74         | f          | 1              | nuc ish(RP11-414G21,ETS1)x3               | Trisomy 11 (D11Z1 hybridization unsuccessful)                 |
| 30                                                  | 81         | f          | 1              | nuc ish(RP11-414G21,ETS1)x2               | Normal. No information for centromere 11                      |
| 31                                                  | 57         | m          | 3              | nuc ish(D11Z1,RP11-414G21,ETS1)x2         | Normal                                                        |
|                                                     |            |            |                | nuc ish(D11Z1x2,RP11-414G21x3,ETS1x3)     | Trisomy 11 (partial)                                          |
|                                                     |            |            |                | nuc ish(RP11-414G21,ETS1)x3               |                                                               |
| 33                                                  | 34         | m          | 1              | nuc ish(D11Z1x2,RP11-414G21x3,ETS1x1)     | 11q gain/loss pattern **                                      |
| 34                                                  | 18         | f          | 1              | nuc ish(D11Z1,RP11-414G21,ETS1)x2         | Normal                                                        |
| 35                                                  | 73         | m          | 1              | nuc ish(D11Z1,RP11-414G21,ETS1)x2         | Normal                                                        |
| 36                                                  | 65         | m          | 1              | nuc ish(D11Z1,RP11-414G21,ETS1)x2         | Normal                                                        |
| 37                                                  | 57         | f          | 1              | nuc ish(D11Z1,RP11-414G21,ETS1)x2         | Normal                                                        |
| 38                                                  | 87         | f          | 1              | nuc ish(D11Z1,RP11-414G21,ETS1)x2         | Normal                                                        |
| 41                                                  | 53         | m          | 1              | nuc ish(D11Z1,RP11-414G21,ETS1)x2         | Normal                                                        |
| 47                                                  | 34         | m          | 1              | nuc ish 11 (CEP11x2,RP11-414G21x2,ETS1x1) | 11q24.3~qter deletion without 11q-proximal gain ***           |

BL, Burkitt-like; f, female; m, male; FISH, fluorescence in-situ hybridization.  
\*Case #4; \*\*Case #3; \*\*\*Case #1

## Supplementary References

1. Swerdlow SH, Campo E, Pileri SA, et al. The 2016 revision of the World Health Organization classification of lymphoid neoplasms. *Blood*. 2016;127(20):2375-2390.
2. Lister TA, Crowther D, Sutcliffe SB, et al. Report of a committee convened to discuss the evaluation and staging of patients with Hodgkin's disease: Cotswolds meeting. *J Clin Oncol*. 1989;7(11):1630-1636.
3. Wagener R, Seufert J, Raimondi F, et al. The mutational landscape of Burkitt-like lymphoma with 11q aberration is distinct from that of Burkitt lymphoma. *Blood*. 2019;133(9):962-966.
4. Bertrand P, Bastard C, Maingonnat C, et al. Mapping of MYC breakpoints in 8q24 rearrangements involving non-immunoglobulin partners in B-cell lymphomas. *Leukemia*. 2007;21(3):515-523.
5. Shi M, Miron PM, Hutchinson L, et al. Anaplastic lymphoma kinase-positive large B-cell lymphoma with complex karyotype and novel ALK gene rearrangements. *Hum Pathol*. 2011;42(10):1562-1567.
6. Cook JR, Shekhter-Levin S, Swerdlow SH. Utility of routine classical cytogenetic studies in the evaluation of suspected lymphomas: results of 279 consecutive lymph node/extranodal tissue biopsies. *Am J Clin Pathol*. 2004;121(6):826-835.
7. Itoyama T, Nanjungud G, Chen W, et al. Molecular cytogenetic analysis of genomic instability at the 1q12-22 chromosomal site in B-cell non-Hodgkin lymphoma. *Genes Chromosomes Cancer*. 2002;35(4):318-328.
8. Johnson NA, Boyle M, Bashashati A, et al. Diffuse large B-cell lymphoma: reduced CD20 expression is associated with an inferior survival. *Blood*. 2009;113(16):3773-3780.
9. Johnson NA, Savage KJ, Ludkovski O, et al. Lymphomas with concurrent BCL2 and MYC translocations: the critical factors associated with survival. *Blood*. 2009;114(11):2273-2279.
10. Johnson NA, Al-Tourah A, Brown CJ, Connors JM, Gascoyne RD, Horsman DE. Prognostic significance of secondary cytogenetic alterations in follicular lymphomas. *Genes Chromosomes Cancer*. 2008;47(12):1038-1048.
11. Le Gouill S, Talmant P, Touzeau C, et al. The clinical presentation and prognosis of diffuse large B-cell lymphoma with t(14;18) and 8q24/c-MYC rearrangement. *Haematologica*. 2007;92(10):1335-1342.
12. Kanungo A, Medeiros LJ, Abruzzo LV, Lin P. Lymphoid neoplasms associated with concurrent t(14;18) and 8q24/c-MYC translocation generally have a poor prognosis. *Mod Pathol*. 2006;19(1):25-33.
13. Havelange V, Ameye G, Theate I, et al. Patterns of genomic aberrations suggest that Burkitt lymphomas with complex karyotype are distinct from other aggressive B-cell lymphomas with MYC rearrangement. *Genes Chromosomes Cancer*. 2013;52(1):81-92.
14. Huang W, Medeiros LJ, Lin P, et al. MYC/BCL2/BCL6 triple hit lymphoma: a study of 40 patients with a comparison to MYC/BCL2 and MYC/BCL6 double hit lymphomas. *Mod Pathol*. 2018;31(9):1470-1478.
15. Macpherson N, Lesack D, Klasa R, et al. Small noncleaved, non-Burkitt's (Burkitt-Like) lymphoma: cytogenetics predict outcome and reflect clinical presentation. *J Clin Oncol*. 1999;17(5):1558-1567.
16. Mizuno Y, Tsukamoto T, Kawata E, et al. Chromosomal abnormality variation detected by G-banding is associated with prognosis of diffuse large B-cell lymphoma treated by R-CHOP-based therapy. *Cancer Med*. 2018;7(3):655-664.



17. Roumier C, Galiegue-Zouitina S, Bastard C, et al. FISH analysis with a YAC probe improves detection of LAZ3/BCL6 rearrangement in non-Hodgkin's lymphoma. *Hematol J*. 2000;1(2):117-125.
18. Seegmiller AC, Garcia R, Huang R, Maleki A, Karandikar NJ, Chen W. Simple karyotype and bcl-6 expression predict a diagnosis of Burkitt lymphoma and better survival in IG-MYC rearranged high-grade B-cell lymphomas. *Mod Pathol*. 2010;23(7):909-920.
19. Bloomfield CD, Arthur DC, Frizzera G, Levine EG, Peterson BA, Gajl-Peczalska KJ. Nonrandom chromosome abnormalities in lymphoma. *Cancer Res*. 1983;43(6):2975-2984.
20. Chenevix-Trench G, Brown JA, Tyler GB, Behm FG. Chromosome analysis of 30 cases of non-Hodgkin's lymphoma. *Med Oncol Tumor Pharmacother*. 1988;5(1):17-32.
21. Bacher U, Haferlach T, Alpermann T, Kern W, Schnittger S, Haferlach C. Several lymphoma-specific genetic events in parallel can be found in mature B-cell neoplasms. *Genes Chromosomes Cancer*. 2011;50(1):43-50.
22. Lin CW, O'Brien S, Faber J, et al. De novo CD5+ Burkitt lymphoma/leukemia. *Am J Clin Pathol*. 1999;112(6):828-835.
23. Tanaka H, Hashimoto S, Abe D, Sakai S, Takagi T. Double-hit lymphoma at second relapse of Burkitt-like lymphoma: a case report. *J Clin Exp Hematop*. 2011;51(1):43-47.
24. Gladstone B, Kadam PR, Balsara BR, Gopal R, Parikh PM, Advani SH. Translocation t(1;21)(q21;p11) with trisomies X and 1q in a diffuse large B-cell lymphoma. *Cancer Genet Cytogenet*. 1994;77(1):91.
25. Reeves BR, Pickup VL. The chromosome changes in non-Burkitt lymphomas. *Hum Genet*. 1980;53(3):349-355.
26. Bosga-Bouwer AG, Kok K, Booman M, et al. Array comparative genomic hybridization reveals a very high frequency of deletions of the long arm of chromosome 6 in testicular lymphoma. *Genes Chromosomes Cancer*. 2006;45(10):976-981.
27. Aamot HV, Torlakovic EE, Eide MB, Holte H, Heim S. Non-Hodgkin lymphoma with t(14;18): clonal evolution patterns and cytogenetic-pathologic-clinical correlations. *J Cancer Res Clin Oncol*. 2007;133(7):455-470.
28. Palanisamy N, Abou-Elella AA, Chaganti SR, et al. Similar patterns of genomic alterations characterize primary mediastinal large-B-cell lymphoma and diffuse large-B-cell lymphoma. *Genes Chromosomes Cancer*. 2002;33(2):114-122.
29. Kumari P, Mukherjee G, Rao CR, et al. Cytogenetic study of non-Hodgkin lymphoma from South India. histologic and geographic correlations. *Cancer Genet Cytogenet*. 2003;141(1):14-19.
30. Cervantes F, Prieto F, Badia L, Orts A. Trisomy of the long arm of chromosome 1 in patients with hematologic malignancies and solid tumors: report of six cases. *Cancer Genet Cytogenet*. 1988;31(2):165-170.
31. Choi HJ, Kim HR, Shin MG, et al. Spectra of chromosomal aberrations in 325 leukemia patients and implications for the development of new molecular detection systems. *J Korean Med Sci*. 2011;26(7):886-892.
32. D'Achille P, Seymour JF, Campbell LJ. Translocation (14;18)(q32;q21) in acute lymphoblastic leukemia: a study of 12 cases and review of the literature. *Cancer Genet Cytogenet*. 2006;171(1):52-56.
33. Lundin C, Hjorth L, Behrendtz M, Ehinger M, Biloglav A, Johansson B. Submicroscopic genomic imbalances in Burkitt lymphomas/leukemias: association with age and further evidence that 8q24/MYC translocations are not sufficient for leukemogenesis. *Genes Chromosomes Cancer*. 2013;52(4):370-377.

34. Zech L, Haglund U, Nilsson K, Klein G. Characteristic chromosomal abnormalities in biopsies and lymphoid-cell lines from patients with Burkitt and non-Burkitt lymphomas. *Int J Cancer*. 1976;17(1):47-56.
